# Supplementary material
Source: MDPI journal article supplement (https://www.mdpi.com/2673-9992/14/1/38)
Supplement: s1 [file s1]

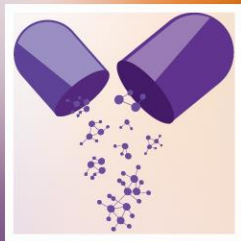

# The 8th International Electronic Conference on Medicinal Chemistry (ECMC 2022)

01-30 NOVEMBER 2022 | ONLINE

## Evaluation of cytotoxic activity of small aminated quinolinequinones *in vitro* as anti cancer molecules

Chaired by **DR. ALFREDO BERZAL-HERRANZ**;  
Co-Chaired by **PROF. DR. MARIA EMÍLIA SOUSA**

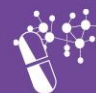

pharmaceuticals

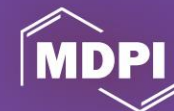

**Ayse Tarbin Jannuzzi <sup>1,\*</sup>, Ayse Mine Yilmaz Goler<sup>2</sup>, and Amac Fatih Tuyun<sup>2</sup>**

<sup>1</sup> *Department of Pharmaceutical Toxicology, Faculty of Pharmacy, Istanbul University, Istanbul, Turkey*

<sup>2</sup> *Department of Biochemistry, School of Medicine/Genetic and Metabolic Diseases Research and Investigation Center, Marmara University, Istanbul, Turkey*

<sup>3</sup> *Department of Chemistry, Faculty of Science, Istanbul University, Fatih, Istanbul 34116, Turkey*

\* Corresponding author: tarbin.cevik@istanbul.edu.tr

# Evaluation of cytotoxic activity of small aminated quinolinequinones *in vitro* as anti cancer molecules

## Graphical Abstract

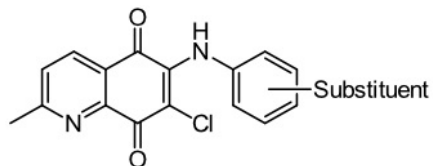

Substituent = EDG or EWG

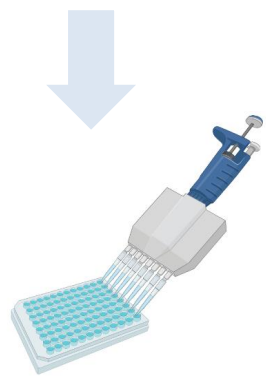

NCI-60 Human Tumor Cell  
Lines Screen

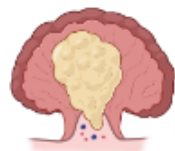

Colon cancer

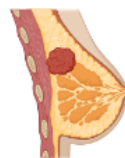

Breast cancer

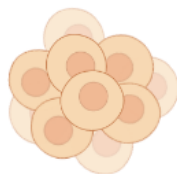

Endothelial cells

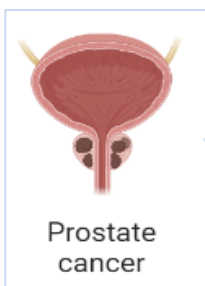

Prostate  
cancer

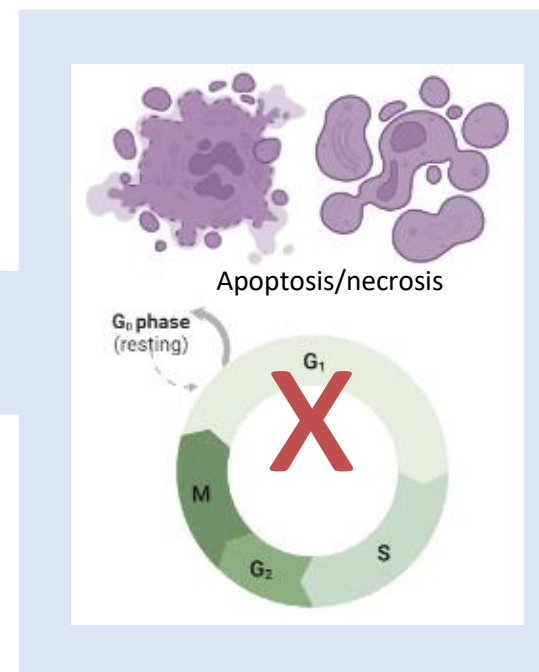

ECMC  
2022

The 8th International Electronic  
Conference on Medicinal Chemistry  
01-30 NOVEMBER 2022 | ONLINE

# Introduction

- Quinones are one of the most significant and widely dispersed chemical family.
- Widely found in natural products.
- Quinone derivatives have been reported to have a range of biological traits such as antibacterial, anticancer, antifungal and anti-inflammatory activities.

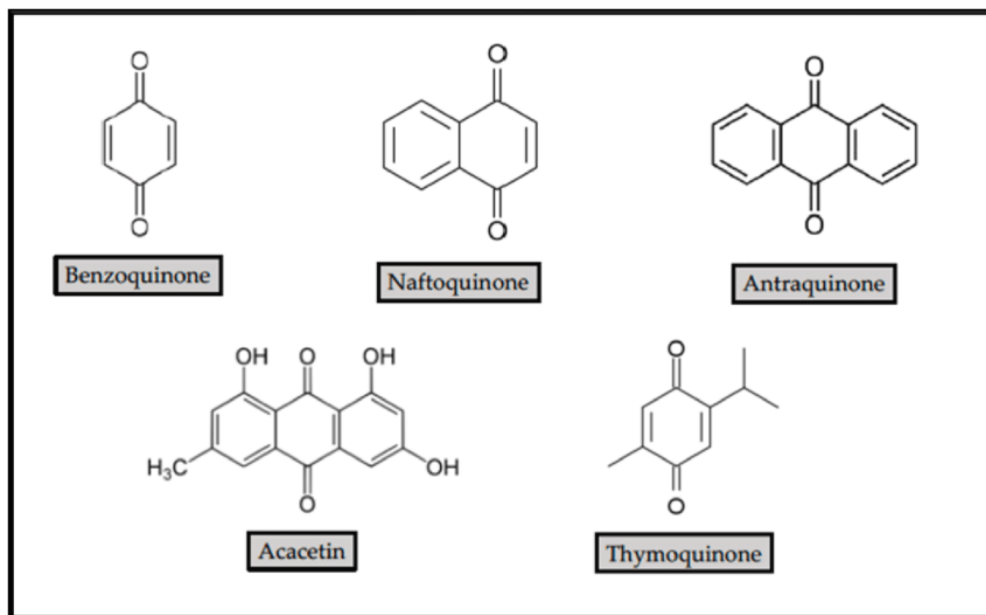

DOI:  
[10.1002/slct.201700692](https://doi.org/10.1002/slct.201700692)  
[10.1021/jm301689x](https://doi.org/10.1021/jm301689x)  
[10.1007/BF02975419](https://doi.org/10.1007/BF02975419)  
[10.1007/BF02975419](https://doi.org/10.1007/BF02975419)  
[10.1016/j.bmc.2008.09.052](https://doi.org/10.1016/j.bmc.2008.09.052)

# Introduction

- As quinone derivatives our group recently reported the synthesis of two subseries of aminated quinolinequinones (AQQs, AQQ1–16) and their antibacterial activity.

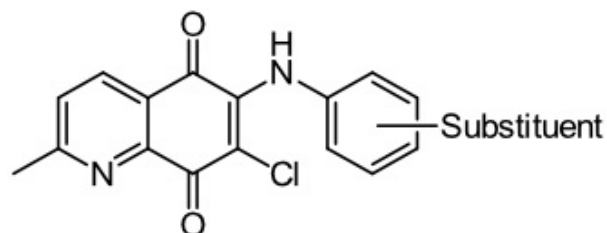

Substituent = EDG or EWG

| ID   | EWG                   | ID    | EDG                                                | ID    | EDG                   |
|------|-----------------------|-------|----------------------------------------------------|-------|-----------------------|
| AQQ1 | 2-CF <sub>3</sub>     | AQQ6  | 3-CH <sub>3</sub>                                  | AQQ12 | 2,3-diCH <sub>3</sub> |
| AQQ2 | 3-CF <sub>3</sub>     | AQQ7  | 4-CH <sub>3</sub>                                  | AQQ13 | 2,4-diCH <sub>3</sub> |
| AQQ3 | 4-CF <sub>3</sub>     | AQQ8  | 2-CH(CH <sub>3</sub> ) <sub>2</sub>                | AQQ14 | 2,5-diCH <sub>3</sub> |
| AQQ4 | 4-CN                  | AQQ9  | 3-CH(CH <sub>3</sub> ) <sub>2</sub>                | AQQ15 | 3,4-diCH <sub>3</sub> |
| AQQ5 | 3,5-diCF <sub>3</sub> | AQQ10 | 4-CH(CH <sub>3</sub> ) <sub>2</sub>                | AQQ16 | 3,5-diCH <sub>3</sub> |
|      |                       | AQQ11 | 4-N(CH <sub>2</sub> CH <sub>3</sub> ) <sub>2</sub> |       |                       |

DOI:10.1016/j.bioorg.2022.10604

5

ECMC  
2022

The 8th International Electronic  
Conference on Medicinal Chemistry  
01–30 NOVEMBER 2022 | ONLINE

# Introduction

- Thus, compounds were sent to NCI Developmental Therapeutics Program  
NCI-60 Human Tumor Cell Lines Screen

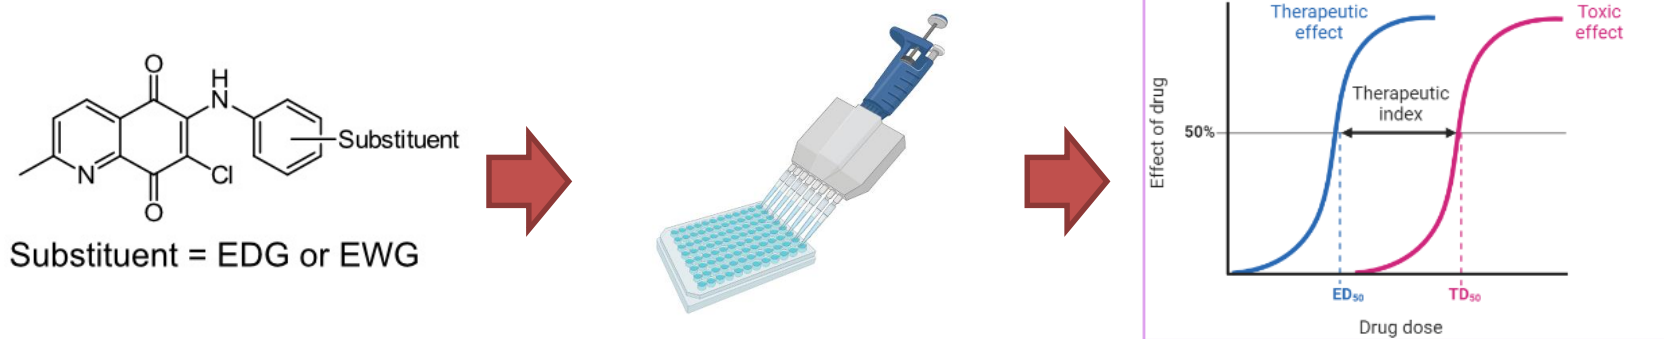

- The findings indicated good cytotoxicity against some cancer types.



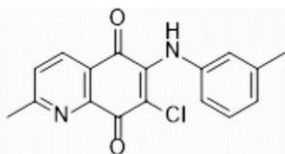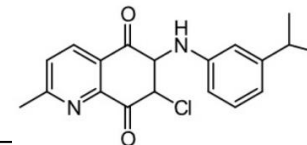

Developmental Therapeutics Program  
One Dose Mean Graph

AQQ6

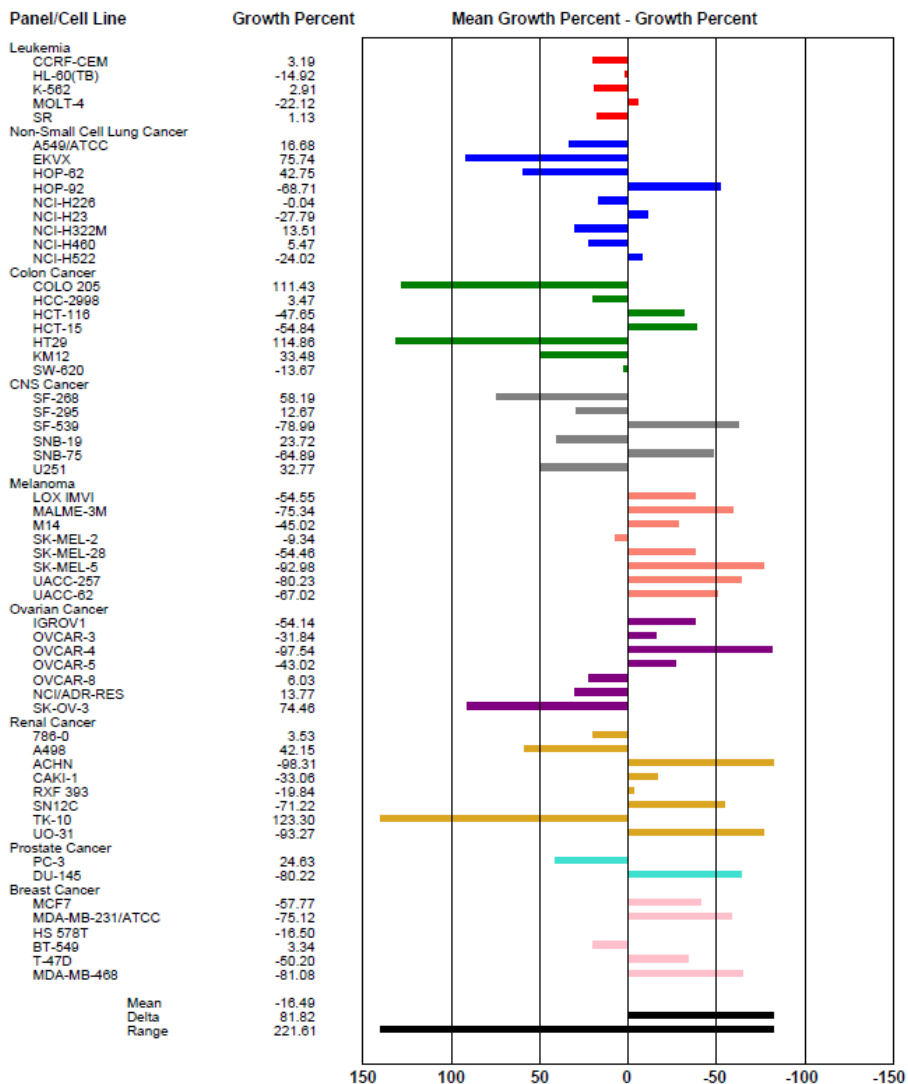

Developmental Therapeutics Program  
One Dose Mean Graph

AQQ9

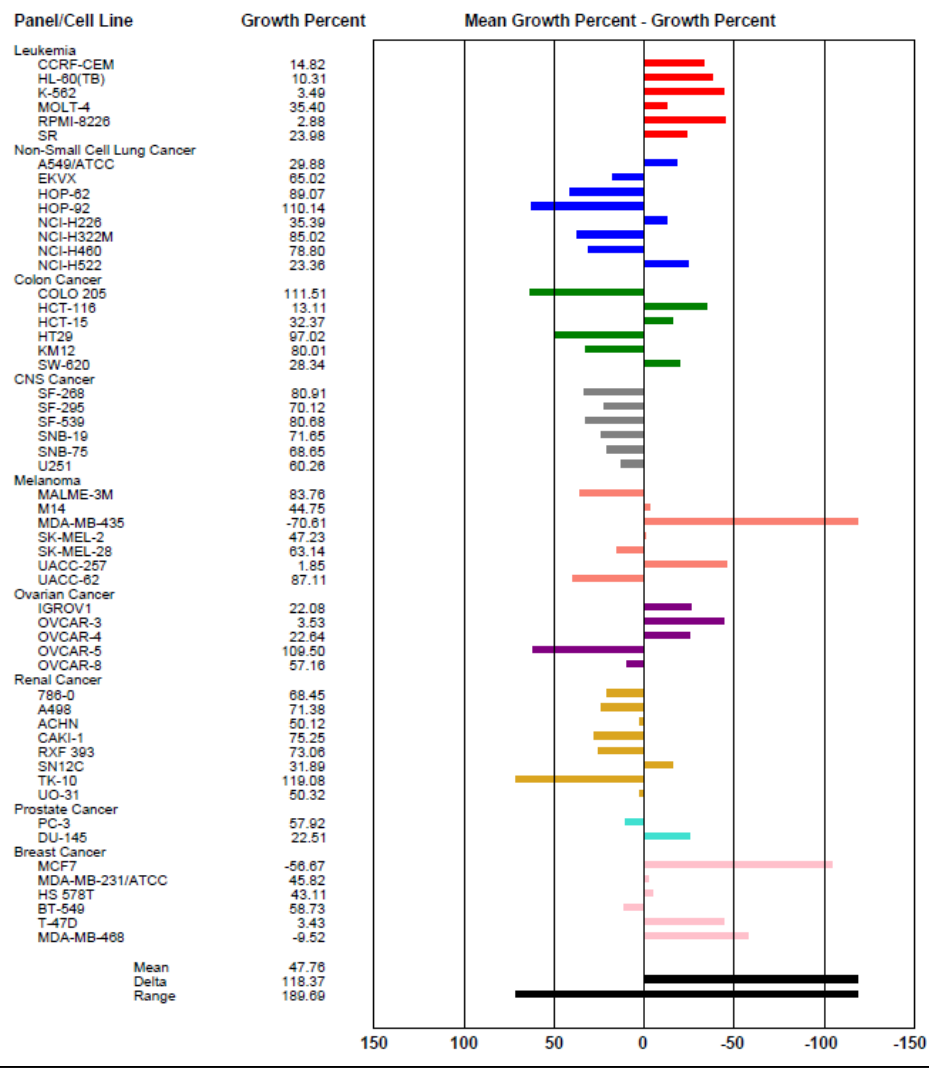

This data encouraged us to check anticancer activity and cancer selectivity with several cell lines

## Results and discussion

### Cell lines

Breast cancer  
MDA-MB-231

Colon cancer  
HCT116

Prostate cancer  
DU145

Healthy control  
HUVEC

Between 0-100  $\mu$ M 24 h exposure and cell viability by MTT test.

# Results and discussion

DU -145

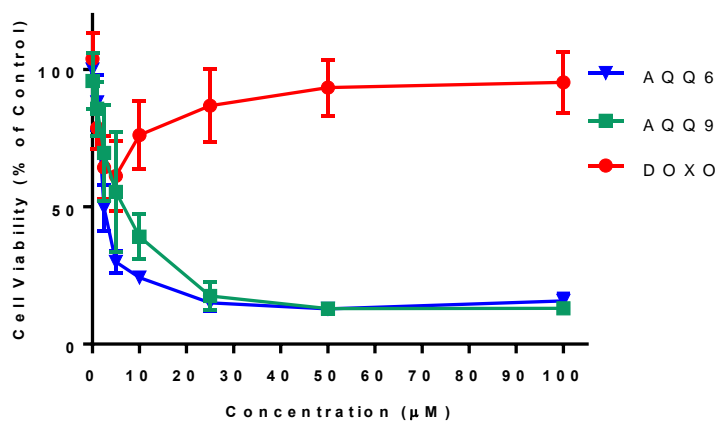

HCT -116

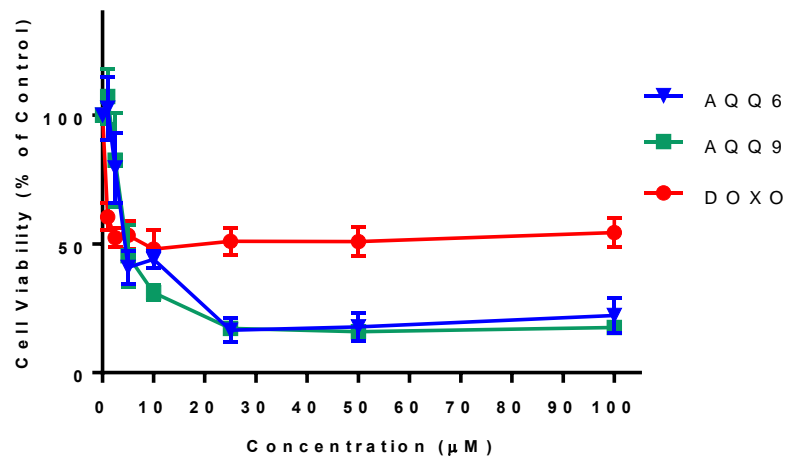

MDA -MB -231

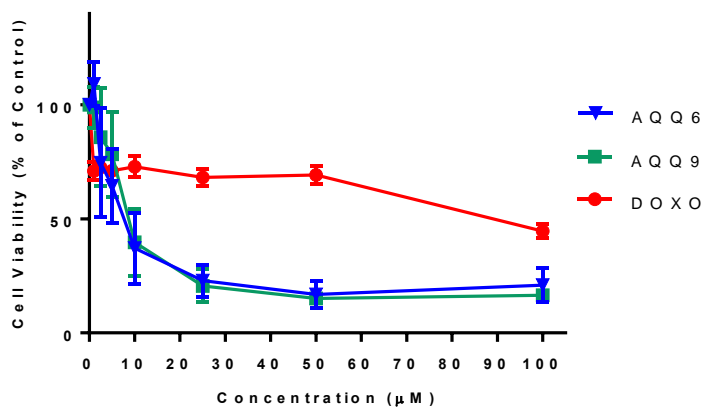

HUVEC

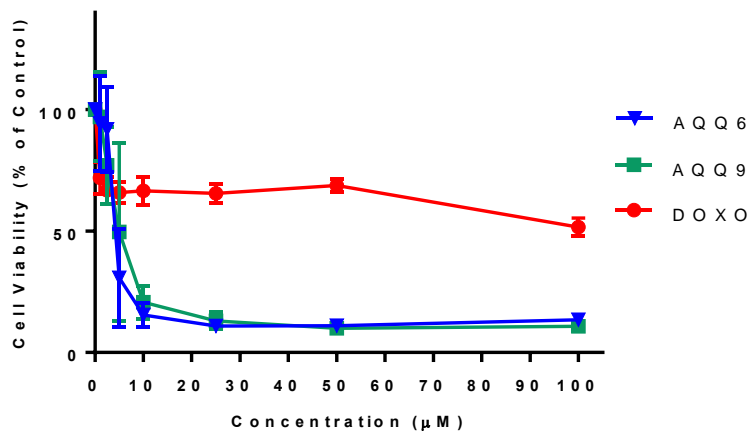



## Results and discussion

|      | ( $\mu\text{M}$ ) | DU-145          | MDA-MB-231       | HCT-116          | HUVEC            |
|------|-------------------|-----------------|------------------|------------------|------------------|
| AQQ6 | IC <sub>50</sub>  | 3.13 $\pm$ 0.15 | 9.05 $\pm$ 3.69  | 7.09 $\pm$ 1.35  | 5.17 $\pm$ 0.16  |
| AQQ9 | IC <sub>50</sub>  | 6.51 $\pm$ 2.35 | 10.54 $\pm$ 3.87 | 6.64 $\pm$ 1.77  | 5.73 $\pm$ 2.15  |
| DOXO | IC <sub>50</sub>  | < 100           | 61.74 $\pm$ 2.59 | 14.72 $\pm$ 2.65 | 81.9 $\pm$ 16.97 |

Effects of AAQ6 and AAQ9 on the growth of DU-145 prostate cancer, MDA-MB-231 breast cancer, HCT-116 colon cancer and and HUVEC non-cancerous cell line after 24h treatment by MTT assay.

IC<sub>50</sub>: The compound concentration required to inhibit cell viability by 50%. The values are expressed as the mean  $\pm$  SD.

# Results and discussion

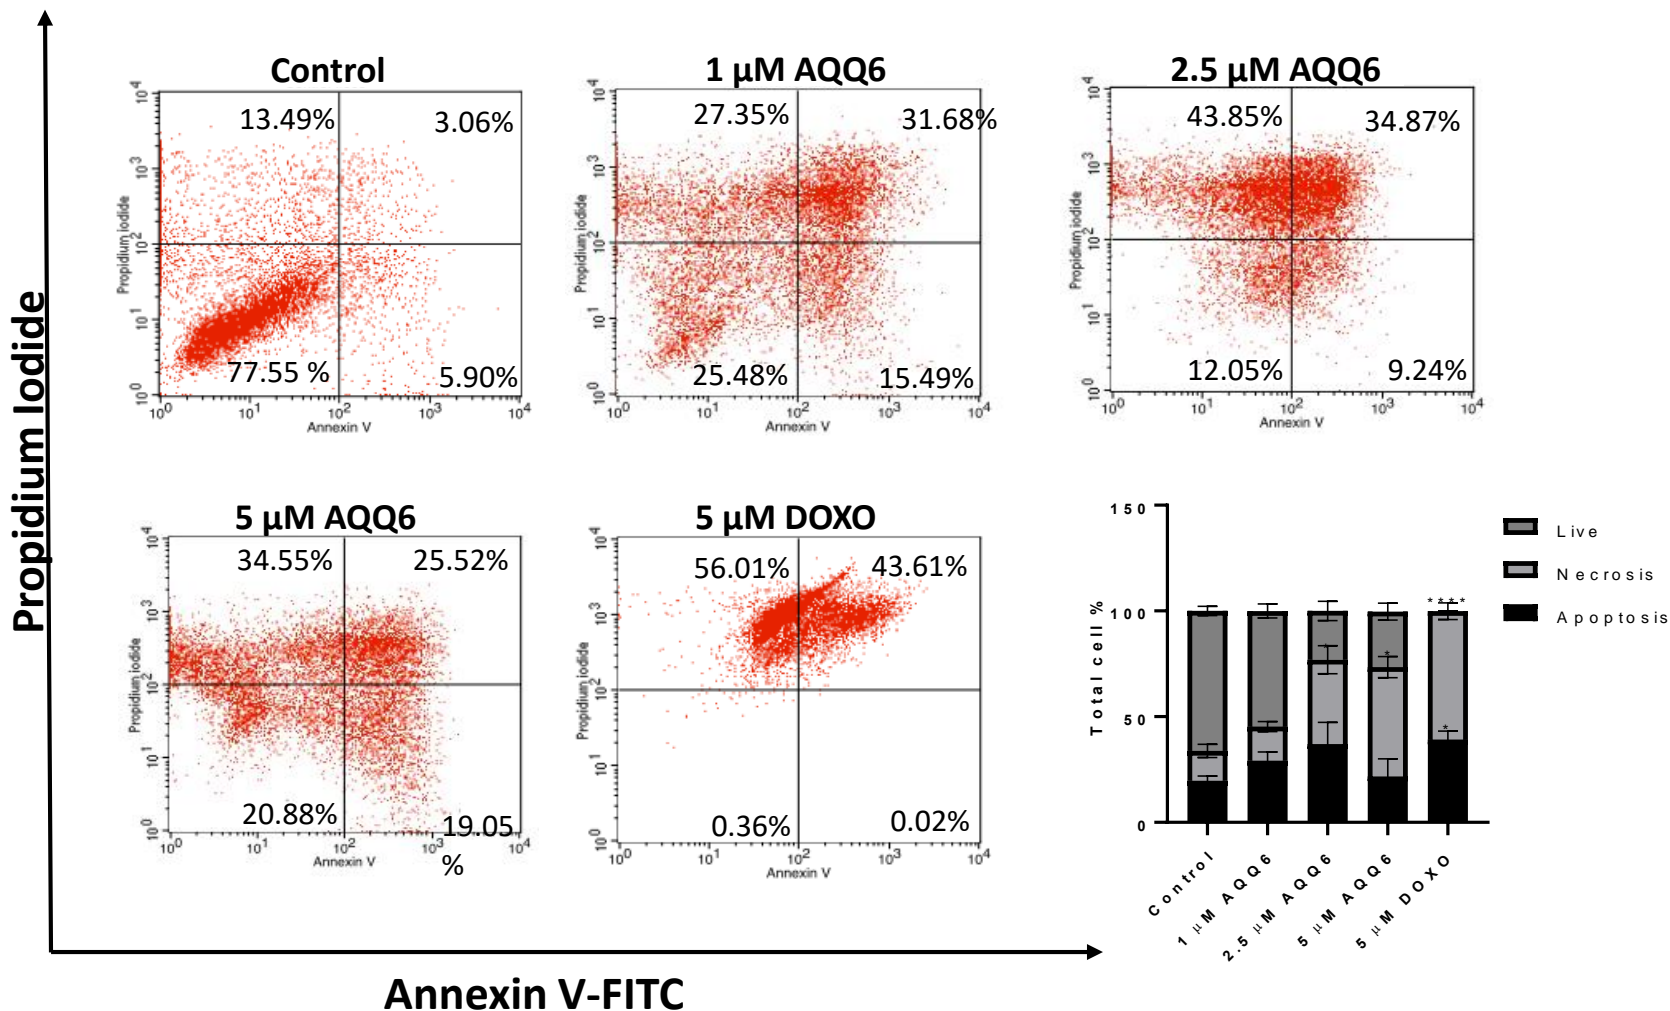

# Results and discussion

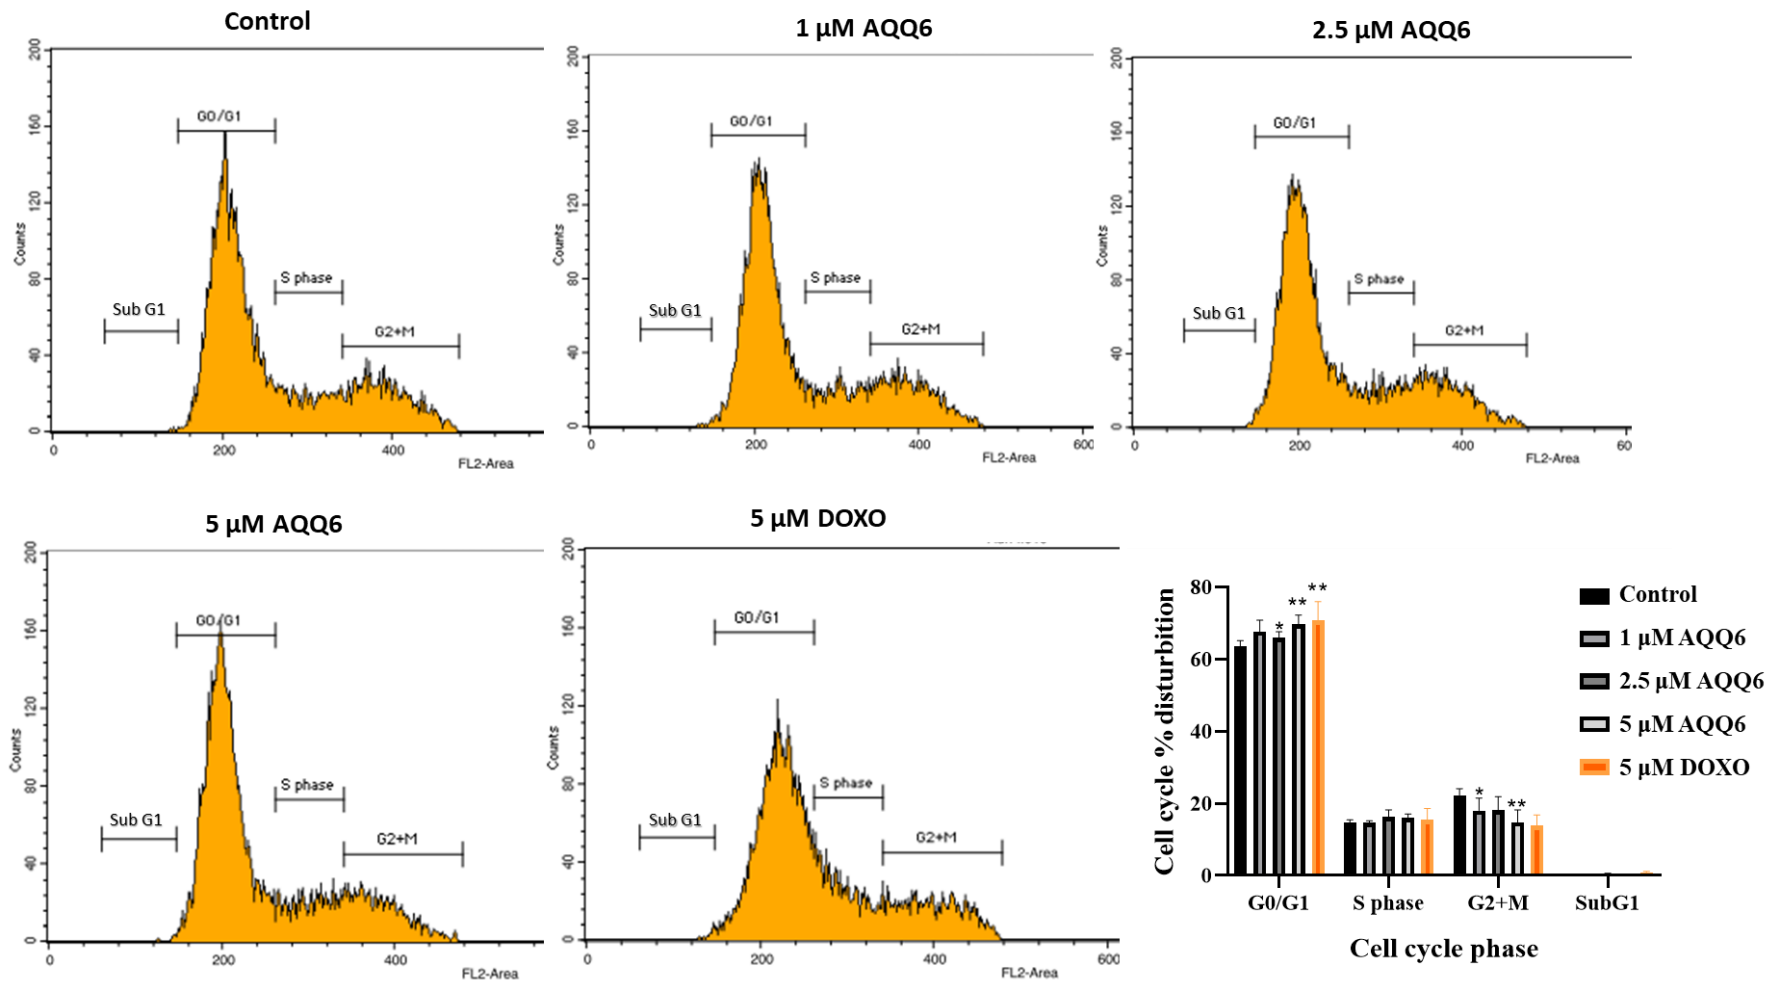

AQQ6 induced G0/G1 cell cycle arrest dose-dependently.

# Results and discussion

ROS level measured by flow cytometry using H<sub>2</sub>DCFDA staining

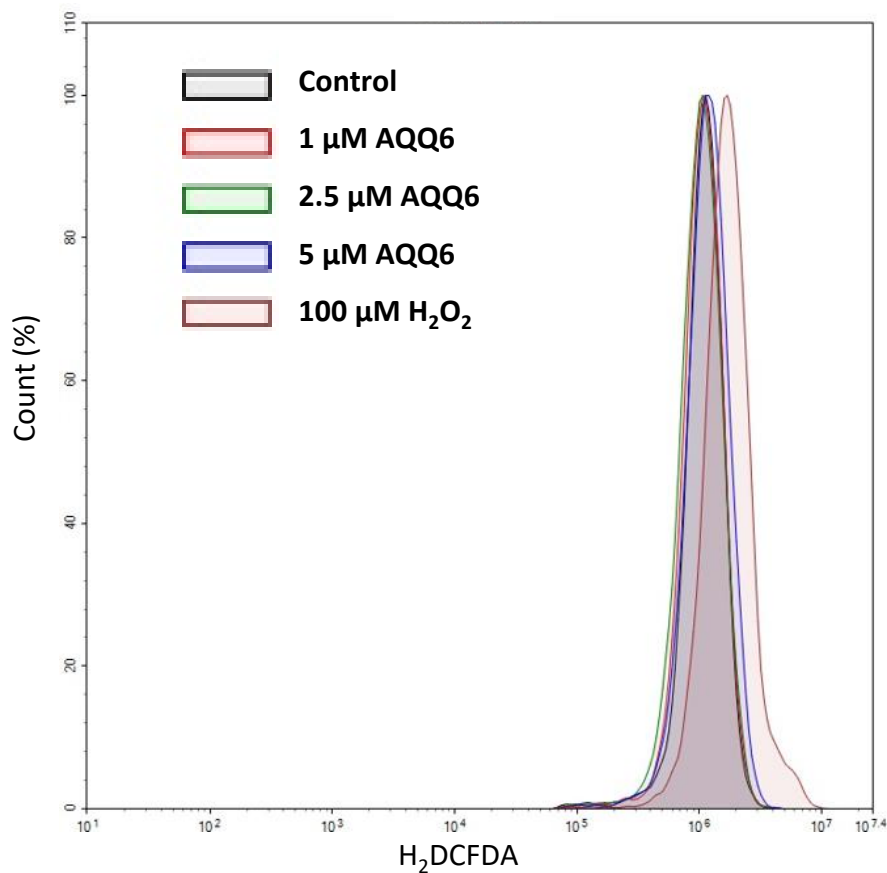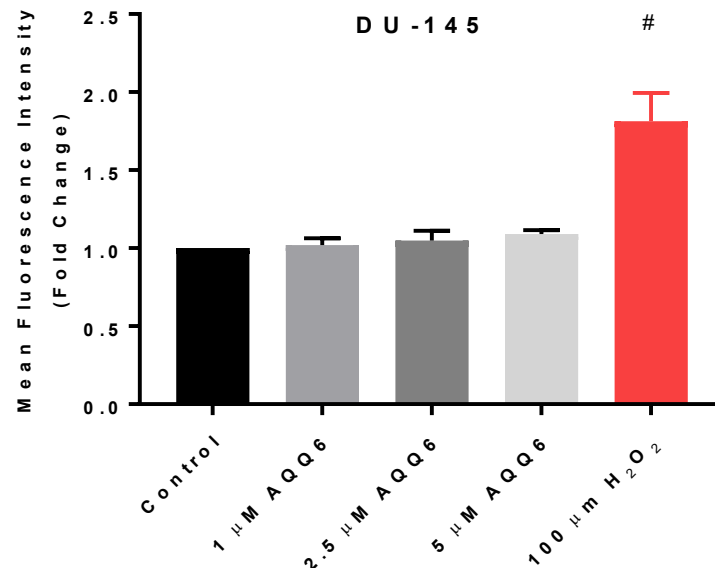

ECMC  
2022

The 8th International Electronic  
Conference on Medicinal Chemistry  
01-30 NOVEMBER 2022 | ONLINE

## Results and discussion

- EDG is essential for biological potency of aminated quinolinequinones.
- Different donor group(s) (EDG, strong (OCH<sub>3</sub>), or weak (CH<sub>3</sub>)) caused different level of anticancer activity.
- Having a weak donor group resulted in stronger antiproliferative effects.
- AQQ6 which carries a methyl substituent was the most active compound and had good selectivity for DU-145 prostate cancer cells.
- Further studies showed that, AQQ6 caused dose dependent G0/G1 cell cycle arrest in DU-145 prostate cancer cells.
- AQQ6 caused apoptotic and necrotic cell death.
- Anticancer activity is not dependent on ROS production.
- In a recent study our group screened AQQ1-15 for their cytotoxic effects on leukemia cell lines. Similarly, weak EDG containing compounds showed higher cytotoxicity and AQQ13 showed the most promising anticancer profile against K562 leukemia cells through leading apoptosis.



## Conclusions

- Aminated quinolinequinones can be promising structures in the drug development for cancer chemotherapy.
- AQQ6 compels attention as a potent and selective drug candidate for further anticancer research especially in prostate cancer.

ECMC  
2022

The 8th International Electronic  
Conference on Medicinal Chemistry  
01-30 NOVEMBER 2022 | ONLINE

## Acknowledgments

This study is supported in part by the Istanbul University Research Fund. Grant no: TAB-2021-37247

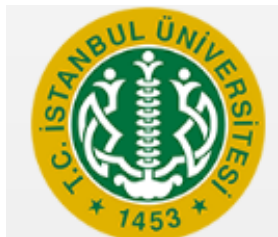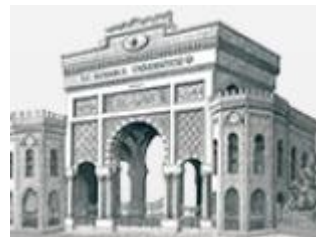

**Thank you for listening!**

**ECMC  
2022**

**The 8th International Electronic  
Conference on Medicinal Chemistry**

01-30 NOVEMBER 2022 | ONLINE
